# Supplementary material
Source: HighWire-hosted journal article supplement (https://fg.bmj.com/highwire/filestream/137121/field_highwire_adjunct_files/0/flgastro-2015-100634supp1.pdf)
Supplement: flgastro-2015-100634supp1.pdf [file flgastro-2015-100634supp1.pdf]

## APPENDIX 1

### Pilot Study Questionnaire

#### Patient Questionnaire

Q1) Overall, how satisfied are you with your care today? 1(not satisfied)---10(extremely satisfied)

Q2) Was this experience better than you expected, or worse?

Q3) Are you happy with the decision the doctors made? (admit/discharge/return for review)

Q4) Do you think you could have been seen quicker, if so how?

Q5) Have you any other suggestions of how we could have made your care better?

#### Surgical Staff Questionnaire

Staff Nurse/ SNP/ Charge Nurse/ ED SpR/ ED Cons/ ED Nurse/ FY1 /FY2/ SpR/ Cons Surg / Other.....

Q1) Are you aware of the new HOT Clinic for emergency surgical patients and a Consultant attached to PAA/SOU/ED from 1-5pm Mon-Fri? Y/N

Q2) Do you feel that this has improved management of emergency patients? Y/N

Q3) Any other comments .....
